# Supplementary material for: The cotreatment of landfill leachate and high-nitrate wastewater using SBRs: evaluation of denitrification performance and microbial analysis
Source: Royal Society of Chemistry journal article supplement (doi:10.1039/c9ra07966a), 2019-01-01
Supplement: c9ra07966a1.pdf [file c9ra07966a1.pdf]

Electronic Supplementary Information for

**Cotreatment of landfill leachate and high-nitrate wastewater  
using SBRs: Evaluation of denitrification performance and  
microbial analysis**

Huaguang Liu <sup>a</sup>, Xingyu Zhou <sup>b,c,\*</sup>, Chaoshen Zhang <sup>a</sup>, Jinsong Zhang <sup>a,b,c</sup>

<sup>a</sup> *School of Civil Engineering, Guangzhou University, Guangzhou Higher Education  
Mega Centre, Guangzhou 510006, PR China*

<sup>b</sup> *Shenzhen Municipal Wastewater Treatment and Recycling Engineering Laboratory,  
Shenzhen Water (Group) Co. Ltd., Shenzhen 518000, PR China*

<sup>c</sup> *School of Environment, Harbin Institute of Technology, Harbin 150090, PR China*

\*Corresponding author: E-mail: [zhouxingyu2017@163.com](mailto:zhouxingyu2017@163.com); phone/fax: +86 83248863.

(A)

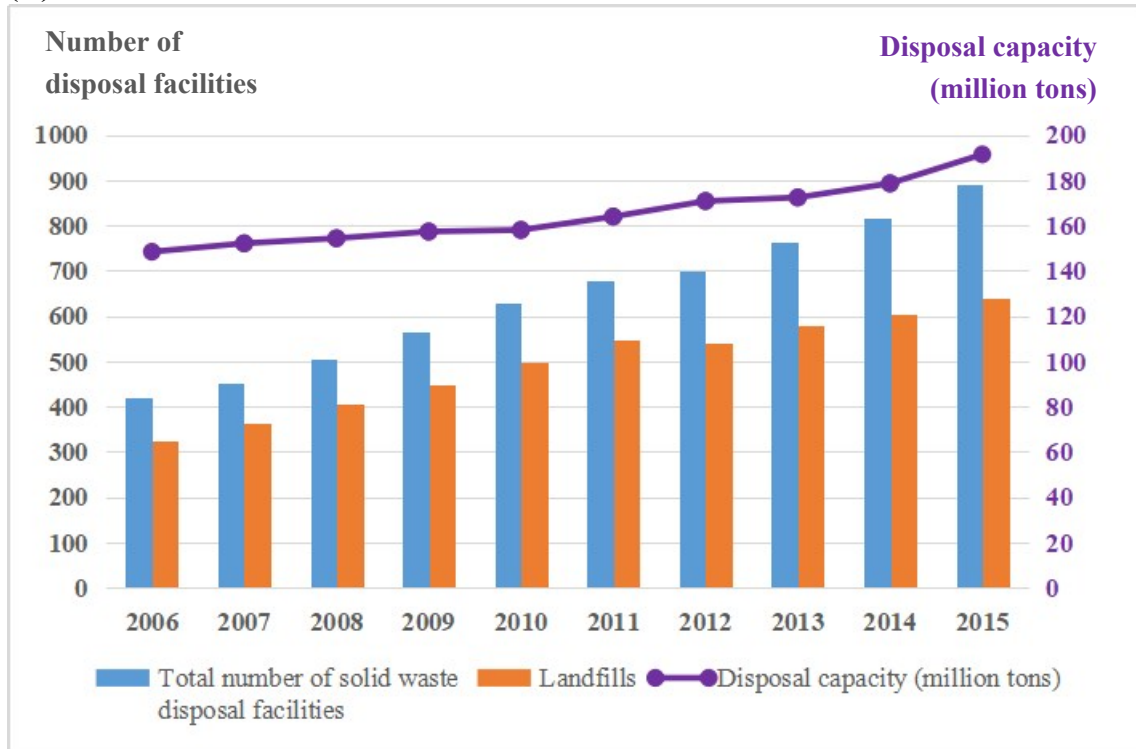

(B)

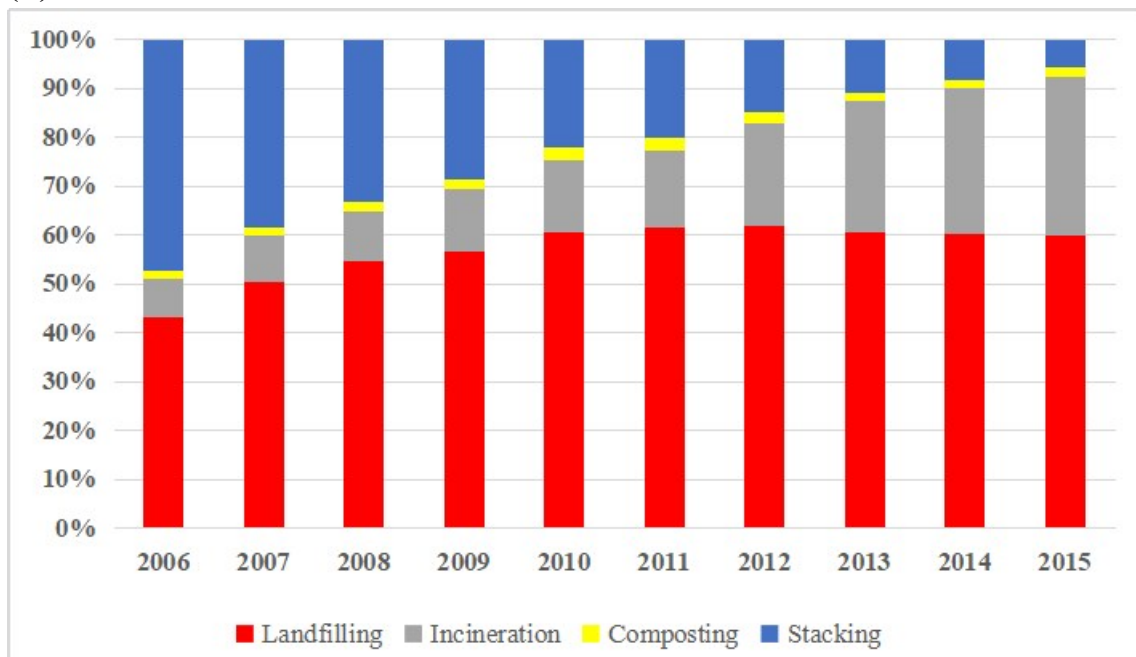

**Fig. S1** Disposal methods, capacity and acilities of municipal solid waste in China from 2006 to 2015. Data from the Professional Committee of Urban Domestic Refuse Treatment of CAEPI.

(A)

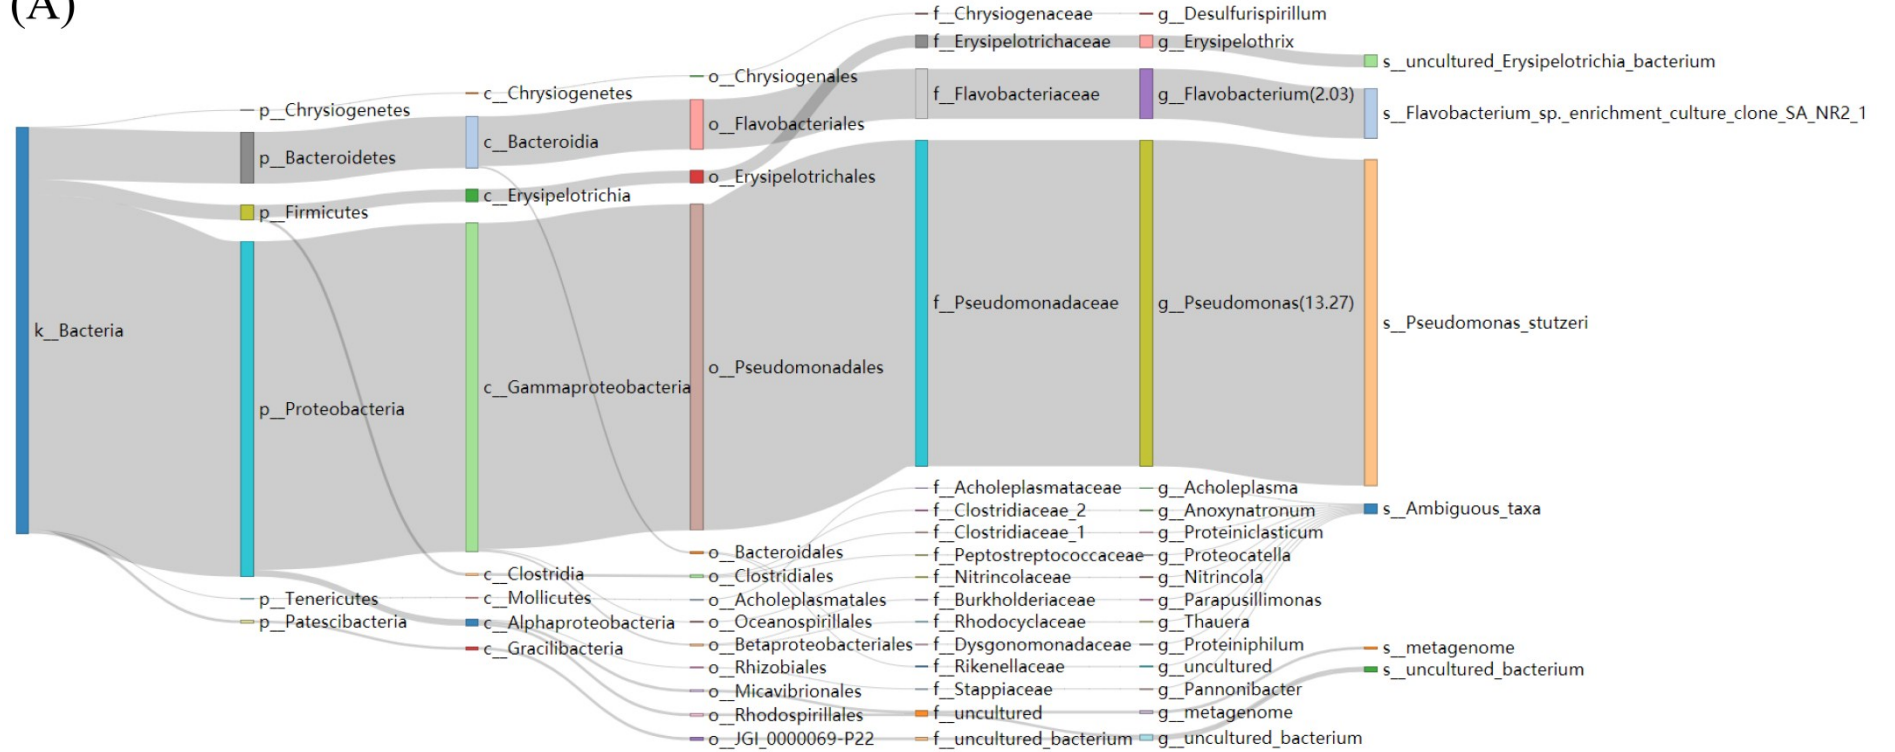

(B)

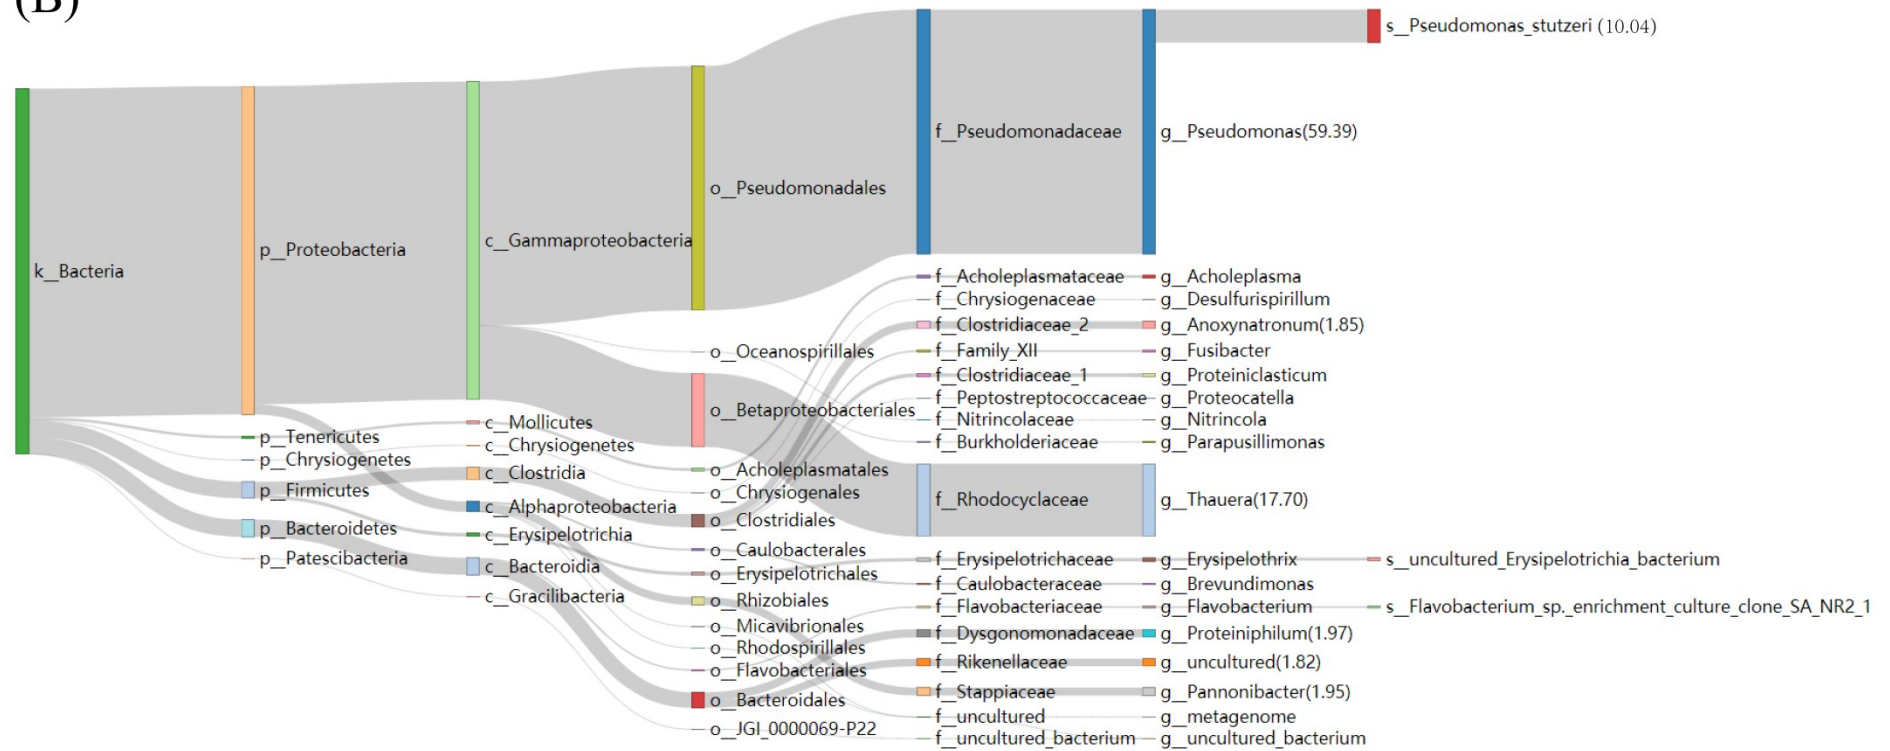

**Fig.2** Evolutionary tree of microbial population. Different colors represent different annotations, the size of the bar graph represents the abundance of the species, and the connection represents the subordinate relationship (aggregation from low level). **(A)**, R1 system. **(B)**, R0 system.

**Table S1** Physicochemical characteristics of raw landfill leachate and pretreated landfill leachate.

| Parameter                       | Abbr.               | Raw landfill leachate |         |         | Pretreated landfill leachate |        |         |
|---------------------------------|---------------------|-----------------------|---------|---------|------------------------------|--------|---------|
|                                 |                     | Max                   | Min     | Mean    | Max                          | Min    | Mean    |
| pH                              | --                  | 9.1                   | 7.6     | 8.2     | 8.9                          | 7.4    | 7.9     |
| Suspended solids                | SS                  | 1803                  | 917     | 1360    | 1021                         | 207    | 614     |
| Chemical oxygen demand          | COD                 | 12660                 | 4420    | 5710    | 8400                         | 3200   | 4610    |
| 5-day biochemical oxygen demand | BOD <sub>5</sub>    | 3690                  | 1020    | 1490    | 3460                         | 950    | 1370    |
| Ammonium nitrogen               | NH <sup>+</sup> 4-N | 4190                  | 1770    | 2480    | 586                          | 164    | 275     |
| Nitrate nitrogen                | NO <sup>-</sup> 3-N | 11.4                  | nd      | 5.3     | 18.0                         | nd     | 12.0    |
| Nitrite nitrogen                | NO <sup>-</sup> 2-N | 5.2                   | nd      | 2.8     | 7.0                          | nd     | 6.0     |
| Total phosphorus                | TP                  | 78.1                  | 15.5    | 33.4    | 26.0                         | 5.0    | 3.0     |
| Total nitrogen                  | TN                  | 5210                  | 1950    | 2530    | 910                          | 190    | 560     |
| Copper ion                      | Cu <sup>2+</sup>    | 0.22                  | 0.017   | 0.039   | 0.16                         | 0.011  | 0.028   |
| Divalent zinc                   | Zn <sup>2+</sup>    | 0.84                  | 0.26    | 0.55    | 0.67                         | 0.18   | 0.39    |
| Calcium ion                     | Ca <sup>2+</sup>    | 389                   | 161     | 335     | 253                          | 148    | 207     |
| Magnesium ion                   | Mg <sup>2+</sup>    | 54.7                  | 19.5    | 31.8    | 30.5                         | 11.7   | 20.5    |
| Trivalent iron                  | Fe <sup>3+</sup>    | 1.89                  | 0.55    | 1.62    | 0.95                         | 0.51   | 0.78    |
| Hexavalent chromium             | Cr <sup>6+</sup>    | 0.659                 | 0.017   | 0.102   | 0.35                         | 0.024  | 0.085   |
| Molybdenum                      | Mo                  | 0.012                 | 0.0031  | 0.0078  | 0.0099                       | 0.0014 | 0.0039  |
| Arsenic                         | As                  | 0.1080                | 0.0075  | 0.0261  | 0.13                         | nd     | 0.0209  |
| Mercury                         | Hg                  | 0.00394               | 0.00015 | 0.00088 | 0.005                        | nd     | 0.00074 |
| Cadmium                         | Cd                  | nd                    | nd      | nd      | nd                           | nd     | nd      |
| Lead                            | Pb                  | nd                    | nd      | nd      | nd                           | nd     | nd      |
| Chromium                        | Cr                  | 0.98                  | 0.17    | 0.56    | 1.3                          | 0.2    | 0.41    |

**Table S2** Components dosage of the synthetic high-nitrate wastewater fed to the SBR during domestication stage.

| Condition                            | Reagents                                            | Dosage (g·L <sup>-1</sup> ) |               |                |                |                |                |
|--------------------------------------|-----------------------------------------------------|-----------------------------|---------------|----------------|----------------|----------------|----------------|
|                                      |                                                     | 0-5<br>cycle                | 6-12<br>cycle | 13-18<br>cycle | 19-23<br>cycle | 24-30<br>cycle | 31-46<br>cycle |
| Synthetic<br>wastewater <sup>a</sup> | CH <sub>3</sub> COONa                               | 0.36                        | 0.71          | 1.43           | 2.14           | 2.86           | 3.57           |
|                                      | KNO <sub>3</sub>                                    | 0.083                       | 0.16          | 0.33           | 0.49           | 0.65           | 0.81           |
|                                      | KH <sub>2</sub> PO <sub>4</sub>                     | 0.004                       | 0.009         | 0.017          | 0.025          | 0.037          | 0.04           |
|                                      | MgSO <sub>4</sub>                                   | 0.015                       | 0.015         | 0.025          | 0.025          | 0.03           | 0.03           |
|                                      | CaCl <sub>2</sub>                                   | 0.03                        | 0.03          | 0.05           | 0.05           | 0.06           | 0.06           |
|                                      | FeCl <sub>3</sub> ·6H <sub>2</sub> O                | 1.50                        | 1.50          | 1.50           | 1.50           | 1.50           | 1.50           |
|                                      | CuSO <sub>4</sub> ·5H <sub>2</sub> O                | 0.03                        | 0.03          | 0.03           | 0.03           | 0.03           | 0.03           |
|                                      | ZnSO <sub>4</sub> ·7H <sub>2</sub> O                | 0.12                        | 0.12          | 0.12           | 0.12           | 0.12           | 0.12           |
| Trace<br>elements <sup>b</sup>       | CoCl <sub>2</sub> ·6H <sub>2</sub> O                | 0.15                        | 0.15          | 0.15           | 0.15           | 0.15           | 0.15           |
|                                      | EDTA                                                | 10.00                       | 10.00         | 10.00          | 10.00          | 10.00          | 10.00          |
|                                      | KI                                                  | 0.18                        | 0.18          | 0.18           | 0.18           | 0.18           | 0.18           |
|                                      | Na <sub>2</sub> MoO <sub>4</sub> ·2H <sub>2</sub> O | 0.06                        | 0.06          | 0.06           | 0.06           | 0.06           | 0.06           |
|                                      | H <sub>3</sub> BO <sub>3</sub>                      | 0.15                        | 0.15          | 0.15           | 0.15           | 0.15           | 0.15           |
|                                      | MnCl <sub>2</sub> ·4H <sub>2</sub> O                | 0.12                        | 0.12          | 0.12           | 0.12           | 0.12           | 0.12           |

Note: a/b at a volume ratio of 1000:1

**Table S3** Detection methods and instrument models of wastewater indicators.

| Parameter           | Methods                                                               | Manufacturer and model of the Instrument                  |
|---------------------|-----------------------------------------------------------------------|-----------------------------------------------------------|
| SS                  | Gravimetry method 2540 <sup>a</sup>                                   | XS105DU electronic analytical balance                     |
| COD                 | Colourimetric method 5220 D <sup>a</sup>                              | Hach COD reactor 45600- 00/Hach DR 2010 spectrophotometer |
| BOD <sub>5</sub>    | method 5210 B <sup>a</sup>                                            | Hach BODTrakII respirometric apparatus                    |
| NH <sup>+</sup> 4-N | Nessler Reagent Spectrophotometry                                     | Shimadzu UV-160A spectrophotometer                        |
| NO <sup>-</sup> 3-N | method 4500 C - NO <sup>-</sup> 3 <sup>a</sup>                        | Shimadzu UV-160A spectrophotometer                        |
| NO <sup>-</sup> 2-N | method 4500 C - NO <sup>-</sup> 2 <sup>a</sup>                        | Shimadzu UV-160A spectrophotometer                        |
| TP                  | Ammonium molybdate spectrophotometry                                  | Shimadzu UV-160A spectrophotometer                        |
| TN                  | Alkaline potassium persulfate digestion ultraviolet spectrophotometry | Shimadzu UV-160A spectrophotometer                        |
| Zn <sup>2+</sup>    | Ion chromatography                                                    | Thermo ICS-1100 Ion chromatograph                         |
| Cu <sup>2+</sup>    | Ion chromatography                                                    | Thermo ICS-1100 Ion chromatograph                         |
| Ca <sup>2+</sup>    | Ion chromatography                                                    | Thermo ICS-1100 Ion chromatograph                         |
| Mg <sup>2+</sup>    | Ion chromatography                                                    | Thermo ICS-1100 Ion chromatograph                         |
| Cr <sup>6+</sup>    | Ion chromatography                                                    | Thermo ICS-1100 Ion chromatograph                         |
| Fe <sup>3+</sup>    | Ion chromatography                                                    | Thermo ICS-1100 Ion chromatograph                         |
| Mo                  | Inductively Coupled Plasma Method                                     | Agilent 7900 ICP-MS                                       |
| As                  | Inductively Coupled Plasma Method                                     | Agilent 7900 ICP-MS                                       |
| Hg                  | Inductively Coupled Plasma Method                                     | Agilent 7900 ICP-MS                                       |
| Cd                  | Inductively Coupled Plasma Method                                     | Agilent 7900 ICP-MS                                       |
| Pb                  | Inductively Coupled Plasma Method                                     | Agilent 7900 ICP-MS                                       |
| Cr                  | Inductively Coupled Plasma Method                                     | Agilent 7900 ICP-MS                                       |

---

<sup>a</sup> Standard Methods for the Examination of Water and Wastewater



**Table S4** Primers and programs for PCR and quantitative real-time PCR of the five denitrifying functional genes and 16S rDNA in this study.

| Target gens | Primers        | Sequence (5'-3')            | q-PCR (40 Cycles)  |                         | PCR (35 Cycles) |                                      |            | Fragment size (bp) | Ref.                                |
|-------------|----------------|-----------------------------|--------------------|-------------------------|-----------------|--------------------------------------|------------|--------------------|-------------------------------------|
|             |                |                             | Annealing Temp /°C | Thermal profile         | Denaturation    | Annealing Temp/°C                    | Extension  |                    |                                     |
| <i>narG</i> | <i>narG</i> -F | TAYGTSGGGCAGGARAAACTG       | 59.5               | 95°C/5min;<br>95°C/20s, | 95°C/5min       | 95°C/30s,<br>59.5°C/45s,<br>72°C/50s | 72°C/7min  | 110                | Lopez-Gutierrez et al.              |
|             | <i>narG</i> -R | CGTAGAAGAAGCTGGTGCTGTT      |                    | 59.5°C/30s,<br>72°C/40s |                 |                                      |            |                    |                                     |
| <i>nirK</i> | <i>nirK</i> -F | ATCATGGTSCTGCCGCG           | 62.5               | 95°C/3min;<br>95°C/40s, | 94°C/3min       | 94°C/30s,<br>62.5°C/30s,<br>72°C/60s | 72°C/10min | 473                | Hallin et al.                       |
|             | <i>nirK</i> -R | GCCTCGATCAGRTTGTGGTT        |                    | 62.5°C/40s,<br>72°C/60s |                 |                                      |            |                    |                                     |
| <i>nirS</i> | <i>nirS</i> -F | G TSAACG TSAAGGARACSSG      | 59                 | 95°C/5min;<br>95°C/60s, | 94°C/3min       | 94°C/30s,<br>59°C/30s,<br>72°C/60s   | 72°C/10min | 425                | Michotey et al. and Throback et al. |
|             | <i>nirS</i> -R | GASTTCGGRTGSGTCTTGA         |                    | 59°C/60s,<br>72°C/60s   |                 |                                      |            |                    |                                     |
| <i>norB</i> | <i>norB</i> -F | GGNCAYCARGGNTAYGA           | 57                 | 95°C/5min;<br>95°C/30s, | 95°C/3min       | 94°C/30s,<br>57°C/45s,<br>72°C/60s   | 72°C/10min | 262                | Braker et al.                       |
|             | <i>norB</i> -R | ACCCANAGRTGNACNACCCACC<br>A |                    | 57°C/45s,<br>72°C/60s   |                 |                                      |            |                    |                                     |
| <i>nosZ</i> | <i>nosZ</i> -F | AGAACGACCAGCTGATCGACA       | 60                 | 95°C/5min;<br>95°C/60s, | 95°C/3min       | 95°C/45s,<br>60°C/60s,<br>72°C/60s   | 72°C/10min | 300                | Henry et al.                        |
|             | <i>nosZ</i> -R | TCCATGGTGACGCCGTGGTTG       |                    | 60°C/60s,<br>72°C/60s   |                 |                                      |            |                    |                                     |
| 16S rRNA    | 16S-F          | CCTACGGGAGGCAGCAG           | 55                 | 95°C/5min;<br>95°C/30s, | —               | —                                    | —          | 174                | Lopez-Gutierrez et al.              |
|             | 16S-R          | ATTCCGCGGCTGGCA             |                    | 55°C/45s,<br>72°C/50s   |                 |                                      |            |                    |                                     |

F:

forward;

R:

revers

---

---

## References

- G. Braker and J. M. Tiedje, Nitric oxide reductase (norB) genes from pure cultures and environmental samples, *Appl Environ Microbiol*, 2003, **69** (6): 3476-3483.
- S. Hallin and P. E. Lindgren, PCR detection of genes encoding nitrite reductase in denitrifying bacteria, *Appl Environ Microbiol*, 1999, **65**, 1652-1657.
- S. Henry, D. Bru, B. Stres, S. Hallet and L. Philippot, Quantitative detection of the nosZ gene, encoding nitrous oxide reductase, and comparison of the abundances of 16S rRNA, narG, nirK, and nosZ genes in soils, *Appl Environ Microbiol*, 2006, **72**, 5181-5189.
- J. C. Lopez-Gutierrez, S. Henry, S. Hallet, F. Martin-Laurent, G. Catroux and L. Philippot, Quantification of a novel group of nitrate-reducing bacteria in the environment by real-time PCR, *J Microbiol Methods*, 2004, **57**, 399-407.
- V. Michotey, V. Mejean and P. Bonin, Comparison of methods for quantification of cytochrome cd(1)-denitrifying bacteria in environmental marine samples, *Appl Environ Microbiol*, 2000, **66**, 1564-1571.
- I. N. Throback, K. Enwall, A. Jarvis and S. Hallin, Reassessing PCR primers targeting *nirS*, *nirK* and *nosZ* genes for community surveys of denitrifying bacteria with DGGE. *FEMS Microbiol Ecol*, 2004, **49**, 401-417.
